# Supplementary material
Source: publisher figshare collection journal article supplement (https://acs.figshare.com/ndownloader/files/5752188)
Supplement: Supplementary file 1 [file 5752188]

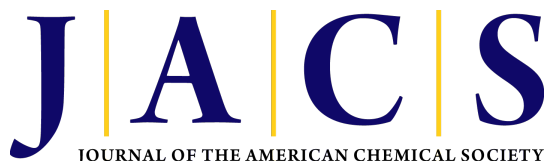

JOURNAL OF THE AMERICAN CHEMICAL SOCIETY

J. Am. Chem. Soc., 1997, 119(31), 7303-7307, DOI: [10.1021/ja962509t](https://doi.org/10.1021/ja962509t)

#### Terms & Conditions

Electronic Supporting Information files are available without a subscription to ACS Web Editions. The American Chemical Society holds a copyright ownership interest in any copyrightable Supporting Information. Files available from the ACS website may be downloaded for personal use only. Users are not otherwise permitted to reproduce, republish, redistribute, or sell any Supporting Information from the ACS website, either in whole or in part, in either machine-readable form or any other form without permission from the American Chemical Society. For permission to reproduce, republish and redistribute this material, requesters must process their own requests via the RightsLink permission system. Information about how to use the RightsLink permission system can be found at <http://pubs.acs.org/page/copyright/permissions.html>

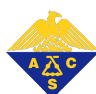

ACS Publications

MOST TRUSTED. MOST CITED. MOST READ.

Copyright © 1997 American Chemical Society

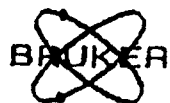

PPM

PRODUCT 1.001  
DATE 27-1-96SF 380.999  
SY 59.0  
O1 -6600.000  
SI 65536  
TD 32768  
SW 15151.515  
HZ/PT .462PW 9.0  
RD 1.220  
AQ 1.081  
RG 32768  
NS 24128  
TE 313FW 19000  
O2 0.0  
OP 63L P0+LB 1.800  
GB 0.0  
CX 25.00  
CY 0.0  
F1 1.000P  
F2 -29.999P  
HZ/CM 472.431  
PPM/CM 1.240  
SR -701.78← dissolved  $^3\text{He}$  standard

SCHUSTERS PRODUCT 1 24128 SCANS 1/26/96

-9.3730

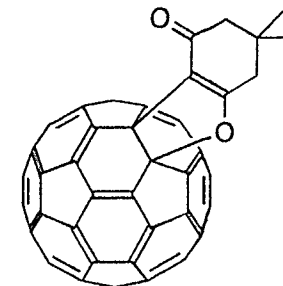

3a

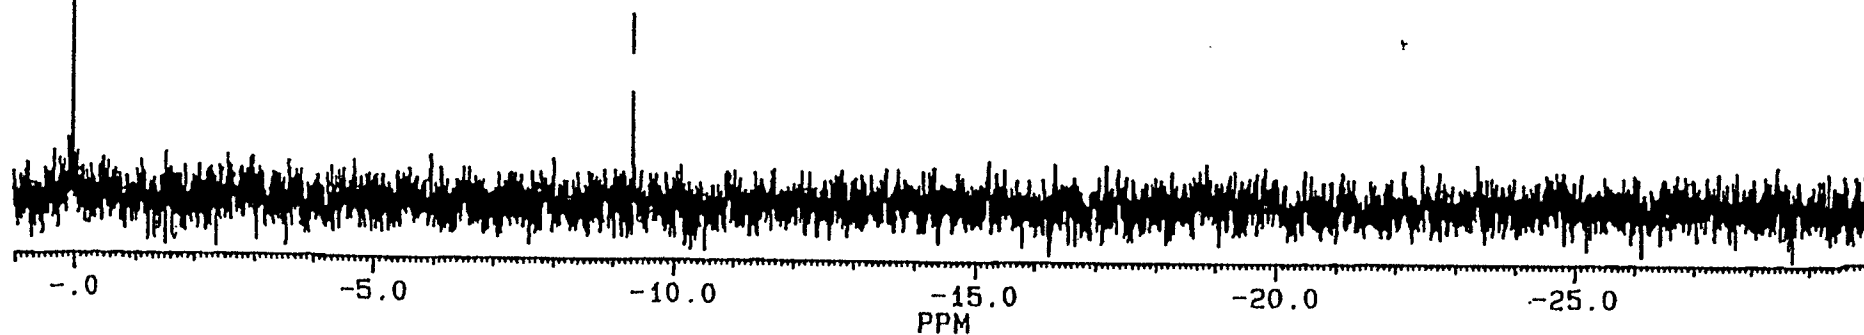

SCHUSTER'S D2 4/14/96

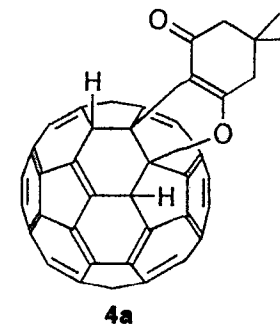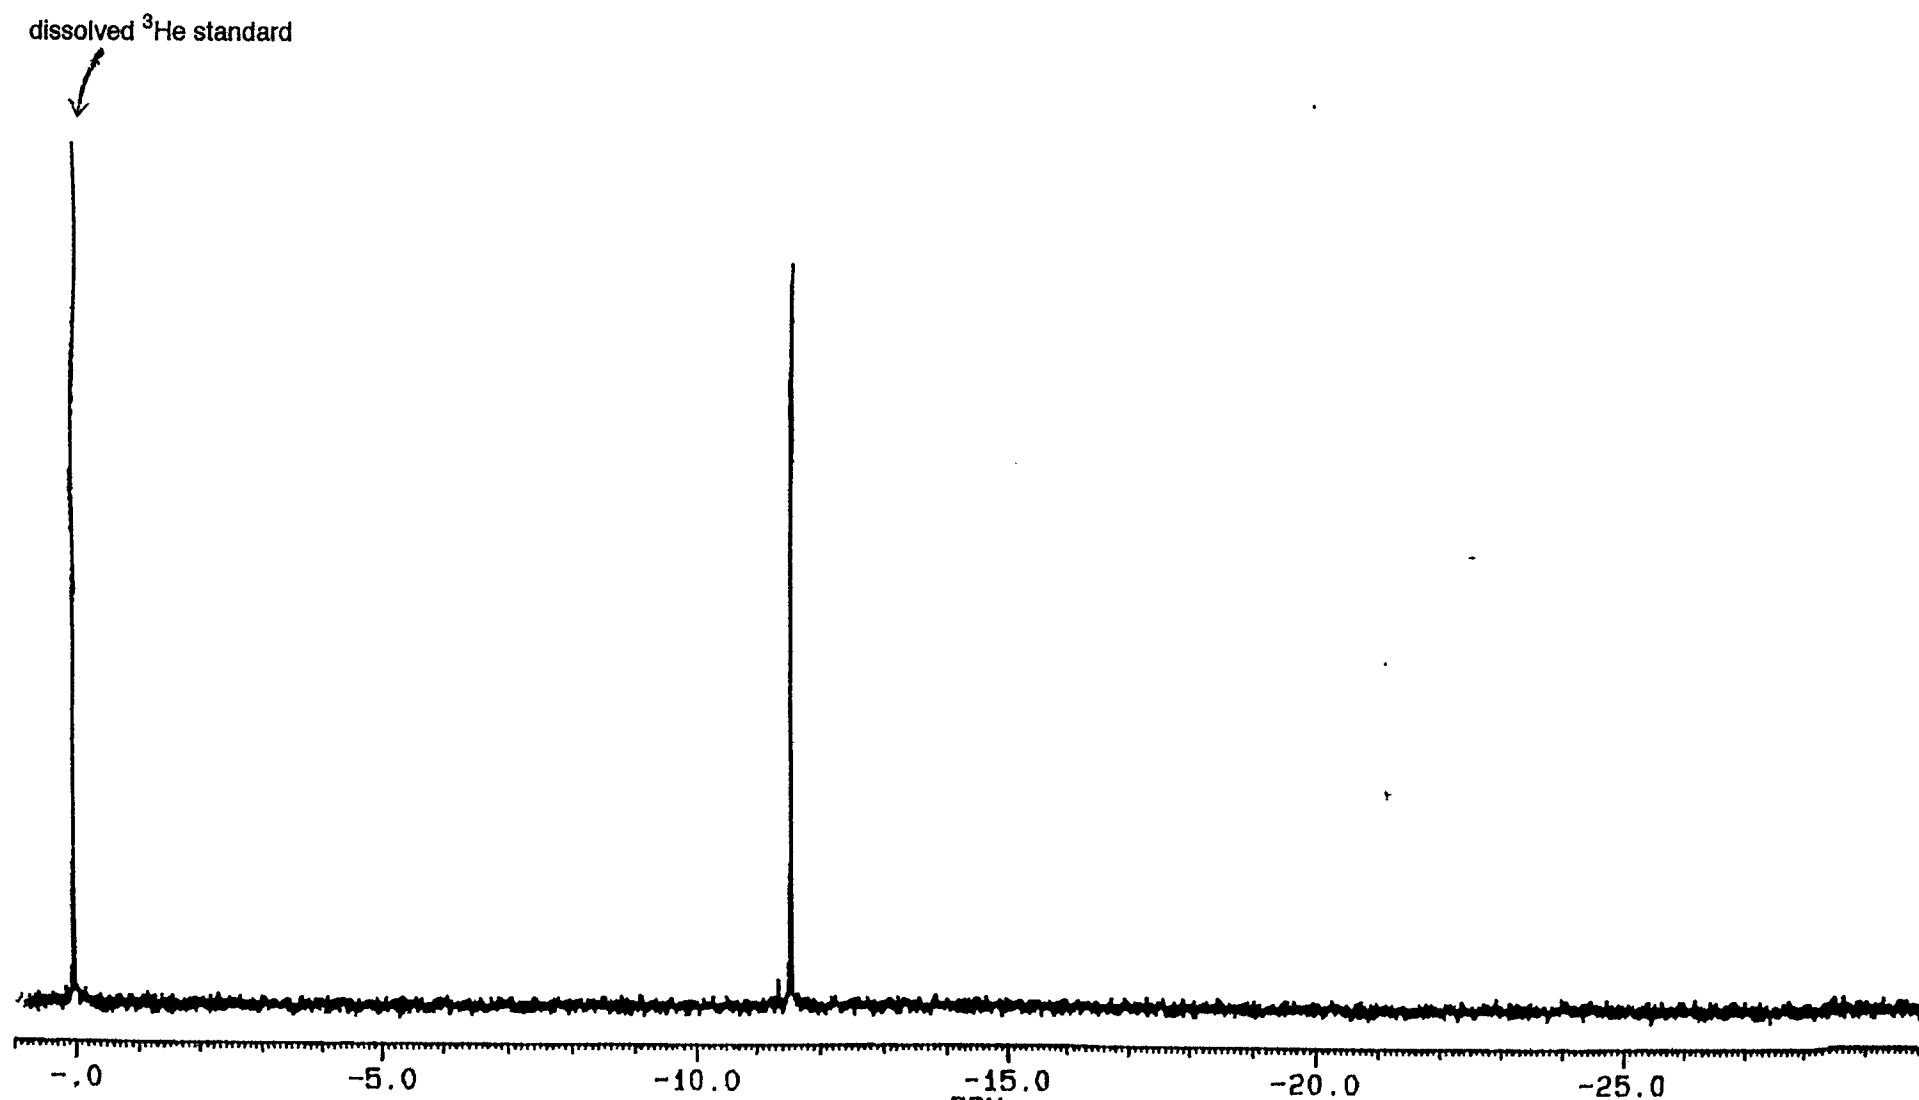

achiral column

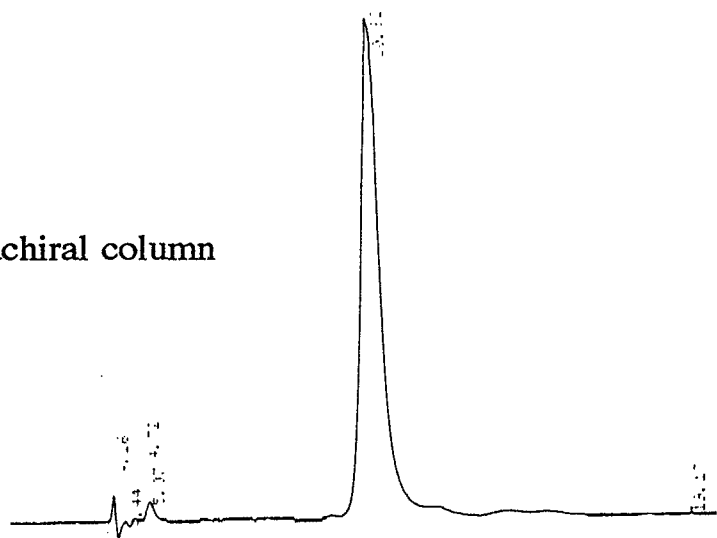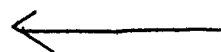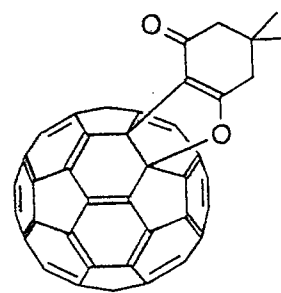

**3a**

chiral column

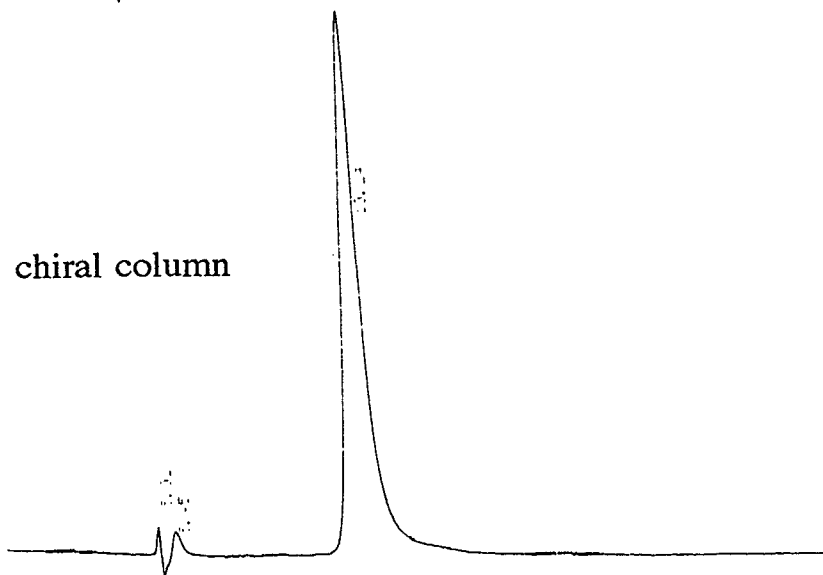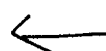

achiral column

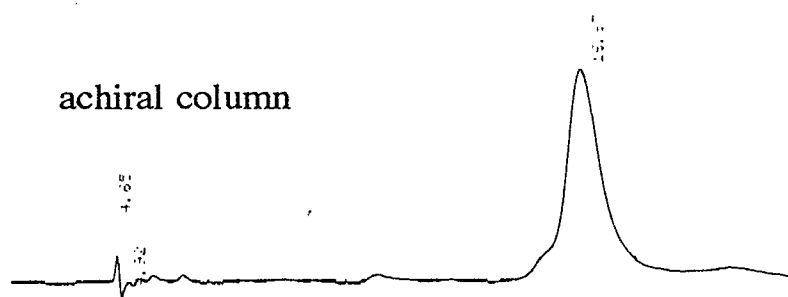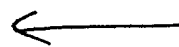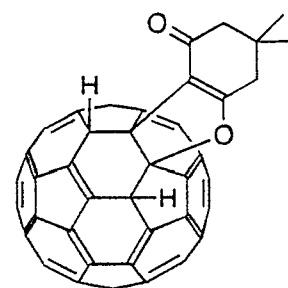

**4a**

chiral column

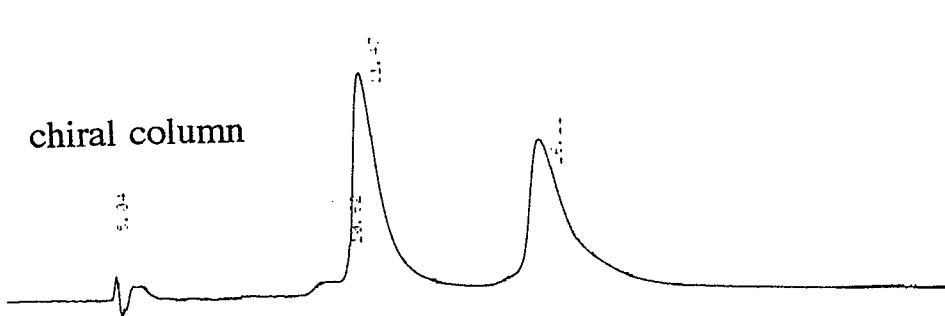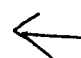

achiral column

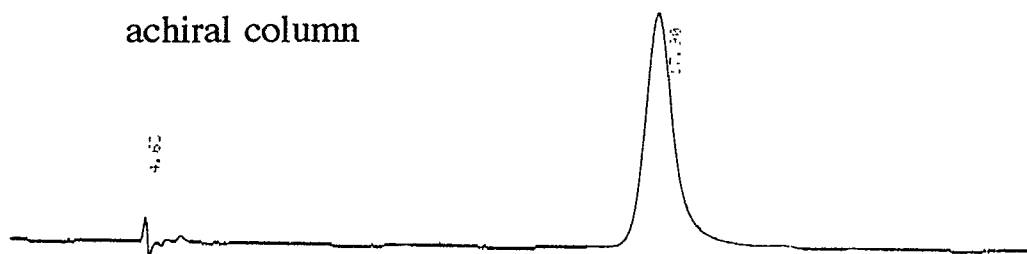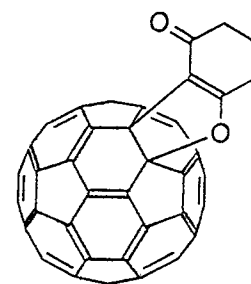

**3b**

chiral column

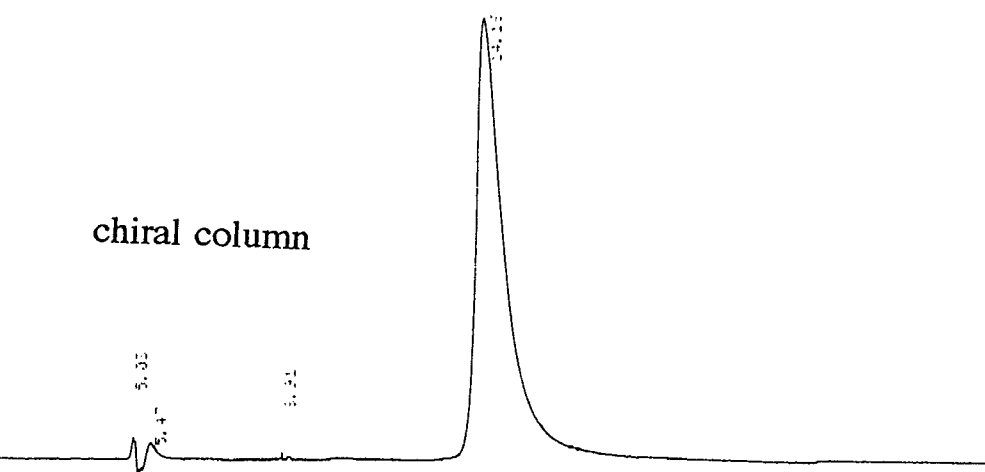

achiral column

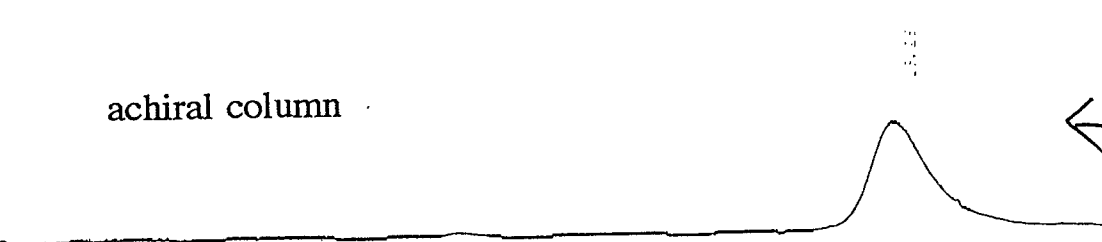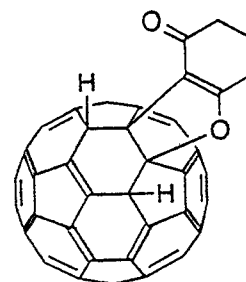

**4b**

chiral column

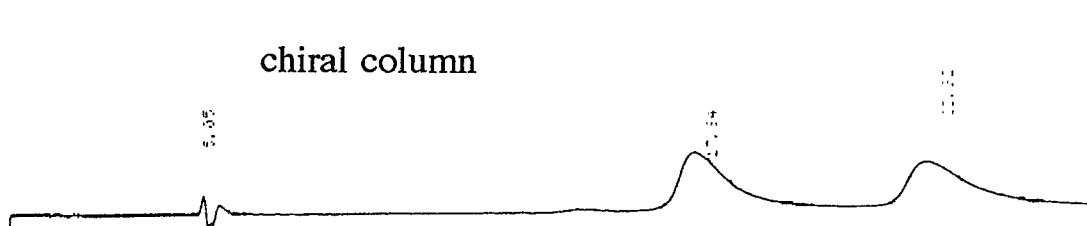

Note on the synthesis of **1b** and **2b**.

In repeating this procedure from the literature, we found that care must be taken to perform the distillation in an oxygen free environment and at as low a pressure as possible, because the desired products tend to decompose. For the photoaddition to C<sub>60</sub>, it is not necessary to distill **1b** and **2b**, which are formed in quantitative crude yields. One only needs to evaporate off the excess HMDS. However, both **1b** and **2b** should also be used within a week of their syntheses, since they slowly decompose on standing ( $t_{1/2}$  is about 2 or 3 weeks).
